# Supplementary material for: Improving Theaflavin-3,3′-digallate Production Efficiency Optimization by Transition State Conformation of Polyphenol Oxidase
Source: MDPI journal article supplement (doi:10.3390/molecules28093831), 2023-04-30
Supplement: s1 [file s1]

This doc file includes:

Supplementary Table S1 to Table S4

Supplementary Figure S1 to Figure S8

Supplementary materials and methods

## Supplementary Tables

**Table S1.** Strains and plasmids used in this study.

| Plasmids or strains      | Relevant characteristics                                                |
|--------------------------|-------------------------------------------------------------------------|
| Plasmids                 |                                                                         |
| pET-28a                  | pBR322 ori, Kan <sup>R</sup> , P <sub>T7</sub> , 6*His, T <sub>T7</sub> |
| Strains                  |                                                                         |
| <i>E.coli</i> JM109      | For plasmid clone                                                       |
| <i>E. coli</i> BL21(DE3) | For enzyme expression and purification                                  |

**Table S2.** The primers for gene amplification.

| Name          | Primer (5' – 3')                                     |
|---------------|------------------------------------------------------|
| <i>Bm</i> -F  | ATGGGTCGCGGATCCGAATTCATGAGTAACAAGTATAGAGTTAGAAAAACGT |
| <i>Bm</i> -R  | GCAAGCTTGTCGACGGAGCTCTTATGAGGAACGTTTGTATTTCTTAA      |
| <i>Ec1</i> -F | AGCAAATGGGTCGCGGATCCATGAGTAAGCTGATTGTCCC             |
| <i>Ec1</i> -R | AGCAAATGGGTCGCGGATCCATGAGTAAGCTGATTGTCCC             |
| <i>Ec2</i> -F | CAGCAAATGGGTCGCGGATCCATGAGTAAGCTGATTGTCCCGC          |
| <i>Ec2</i> -R | TTGTCGACGGAGCTCGAATTCCTTATATCAGCCAAATGAACTTGCC       |
| <i>Bs1</i> -F | GTGGACAGCAAATGGGTCGCGGATCCATGAATACATATCACCCATT       |
| <i>Bs1</i> -R | CAAGCTTGTCGACGGAGCTCGAATTCCTTATGCCTCCTTCATTCCGA      |
| <i>Bs2</i> -F | CTCGAGTGCGGCCGCAAGCTTTTATTTATGGGGATCAGTTATATCCATC    |
| <i>Bs2</i> -R | CAGCAAATGGGTCGCGGATCCATGACACTTGAAAAATTTGTGGATG       |
| <i>An1</i> -F | ATGGGTCGCGGATCCGAATTCATGCACTTGCATACTATCCT            |
| <i>An1</i> -R | AGTGCGGCCGCAAGCTTTTAGATACCAGAATCATCCTCCTCAA          |
| <i>An2</i> -F | AGCAAATGGGTCGCGGATCCATGACAATCTTTTGTACTCCTT           |
| <i>An2</i> -R | TCGAGTGCGGCCGCAAGCTTTTATATACCCGACTCGTAT              |

**Table S3.** The primers for the saturated mutation.

| Name    | Primer (5' – 3')      | Name    | Primer (5' – 3')      |
|---------|-----------------------|---------|-----------------------|
| E158D-F | ACCAAAGATGCGCCGACCCTG | V217D-F | GGTCAGATGGGCGATGTGCCG |
| E158D-R | CGGCGCATCTTTGGTCGCGCC | V217D-R | CGCGGTCGGCACATCGCCCAT |
| E157Q-F | ACCAAACAGGCGCCGACCCTG | V217L-F | GGTCAGATGGGCCTGGTGCCG |
| E157Q-R | CGGCGCCTGTTTGGTCGCGCC | V217L-R | CGCGGTCGGCACAGGCCCAT  |
| F197W-F | CAGCTGGAAGGCTGGATTAAC | V217K-F | GGTCAGATGGGCAAAGTGCCG |
| F197W-R | CGGGCCGTTAATCCAGCCTTC | V217K-R | CGCGGTCGGCACTTTGCCCAT |
| P201A-F | TTTATTAACGGCGCGCAGCTG | V217A-F | GGTCAGATGGGCGCGGTGCCG |
| P201A-R | GTTATGCAGCTGCGCGCCGTT | V217A-R | CGCGGTCGGCACCGCGCCCAT |
| P201S-F | TTTATTAACGGCAGCCAGCTG | V217R-F | GGTCAGATGGGCCGCGTGCCG |
| P201S-R | GTTATGCAGCTGGCTGCCGTT | V217R-R | CGCGGTCGGCACGCGGCCCAT |
| R209A-F | AACCGCGTGCATGCGTGGGTG | V217E-F | GGTCAGATGGGCGAAGTGCCG |
| R209A-R | ACCGCCACCCACGCATGCAC  | V217E-R | CGCGGTCGGCACTTCGCCCAT |
| R209N-F | AACCGCGTGCATAACTGGGTG | V218A-F | CAGATGGGCGTGCGCCGACC  |
| R209N-R | ACCGCCACCCAGTTATGCAC  | V218A-R | CGGCGCGGTCGGCGCCACGCC |
| R209S-F | AACCGCGTGCATAGCTGGGTG | V218L-F | CAGATGGGCGTGCTGCCGACC |
| R209S-R | ACCGCCACCCAGCTATGCAC  | V218L-R | CGGCGCGGTCGGCAGCACGCC |

**Table S4.** Data collection and refinement statistics.

| Parameter                            | <i>Apo-BmTyr</i>       |
|--------------------------------------|------------------------|
| <b>Unit cell dimensions</b>          |                        |
| Space group                          | P4321                  |
| a, b ,c (Å)                          | 111.51, 111.51, 139.66 |
| $\alpha$ , $\beta$ , $\gamma$ (Å)    | 90.00, 90.00, 90.00    |
| Resolution (Å)                       | 46.96-2.30             |
| R <sub>merge</sub>                   | 0.167                  |
| R <sub>pim</sub>                     | 0.112                  |
| <i>I</i> / $\sigma$ <i>I</i>         | 4.08                   |
| Completeness (%)                     | 99.4                   |
| No. reflections                      | 39392                  |
| R <sub>work</sub> /R <sub>free</sub> | 0.190/0.237            |
| No. atoms                            | 4998                   |
| B factors (Å <sup>2</sup> )          | 87.14                  |
| bond lengths (Å)                     | 0.0375                 |
| bond angles (°)                      | 1.4670                 |

## Supplementary Figures

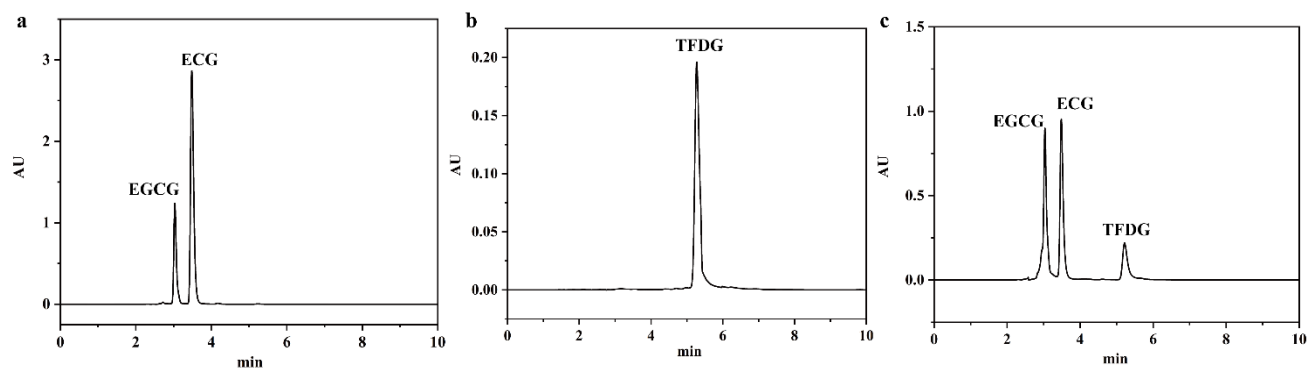

**Figure S1.** The HPLC chromatograms of TFDG reaction products. (A) The chromatographic peak of ECG, EGCG standard solution; (B) The chromatographic peak of TFDG standard solution; (C) Synthesis of TFDG from ECG and EGCG by *BmTyr*.

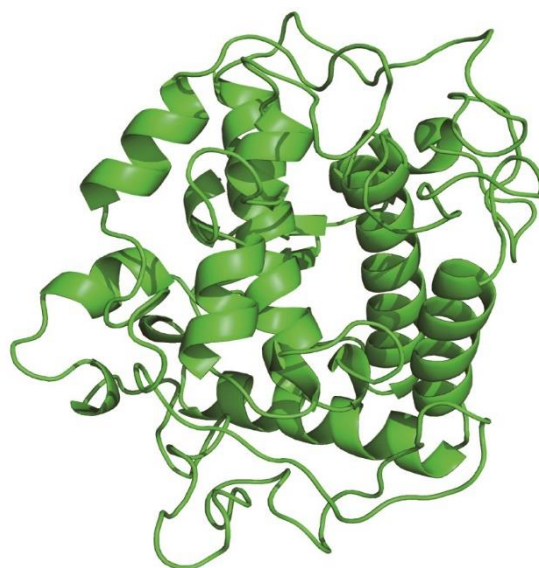

**Figure S2.** The whole structure of *BmTyr* (PDB ID:8HPI).

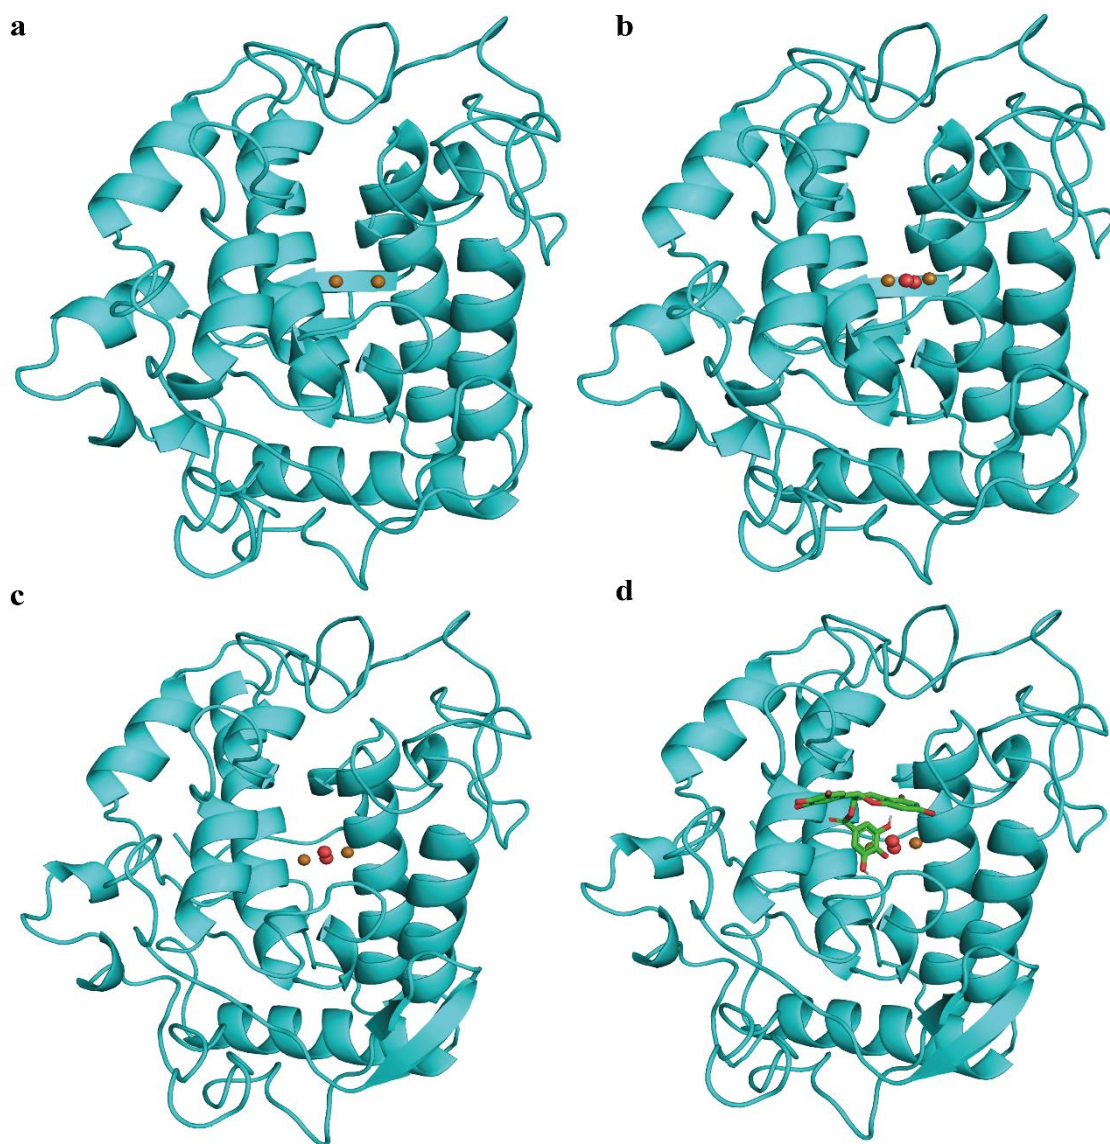

**Figure S3.** The construction process of the whole theoretical complex structure. (A) The whole structure of 3nm8; (B) The reactive binding mode M1 based on 3nm8; (C) The structure cluster analysis (M2); (D) The theoretical complex structure of BmTyr/Cu<sup>2+</sup>-EGCG (M3).



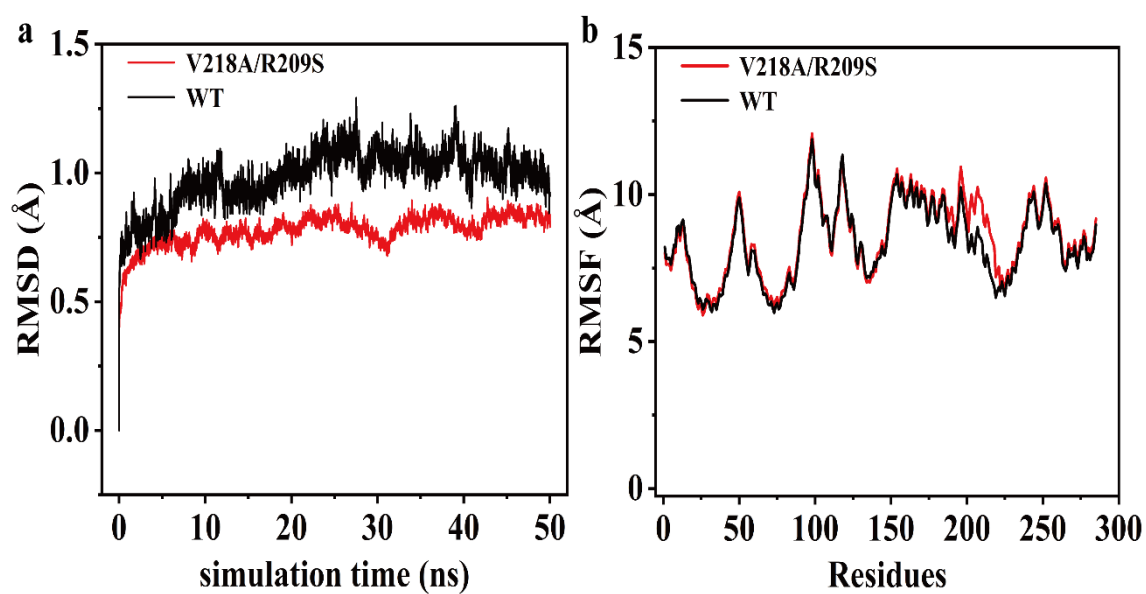

**Figure S4.** RMSD and RMSF of *BmTyr*<sup>WT</sup> and *BmTyr*<sup>V218A/R209S</sup>. (A) RMSD values calculated from MD simulations of *BmTyr*<sup>WT</sup> and *BmTyr*<sup>V218A/R209S</sup>; (B) RMSF values calculated from MD simulations of *BmTyr*<sup>WT</sup> and *BmTyr*<sup>V218A/R209S</sup>.

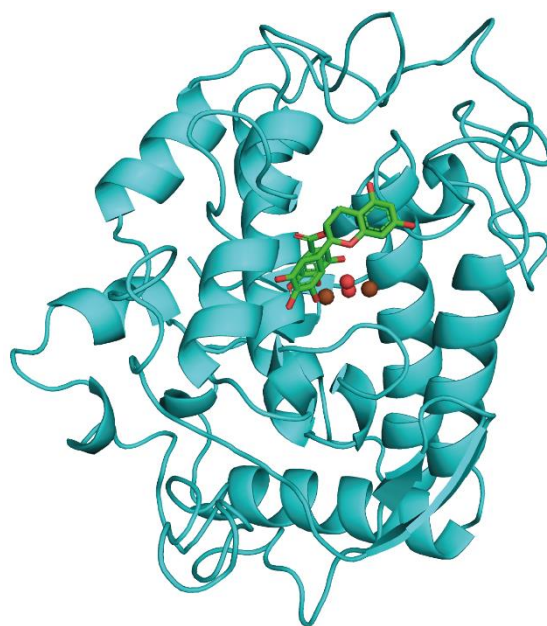

**Figure S5.** The whole TS2 state model.

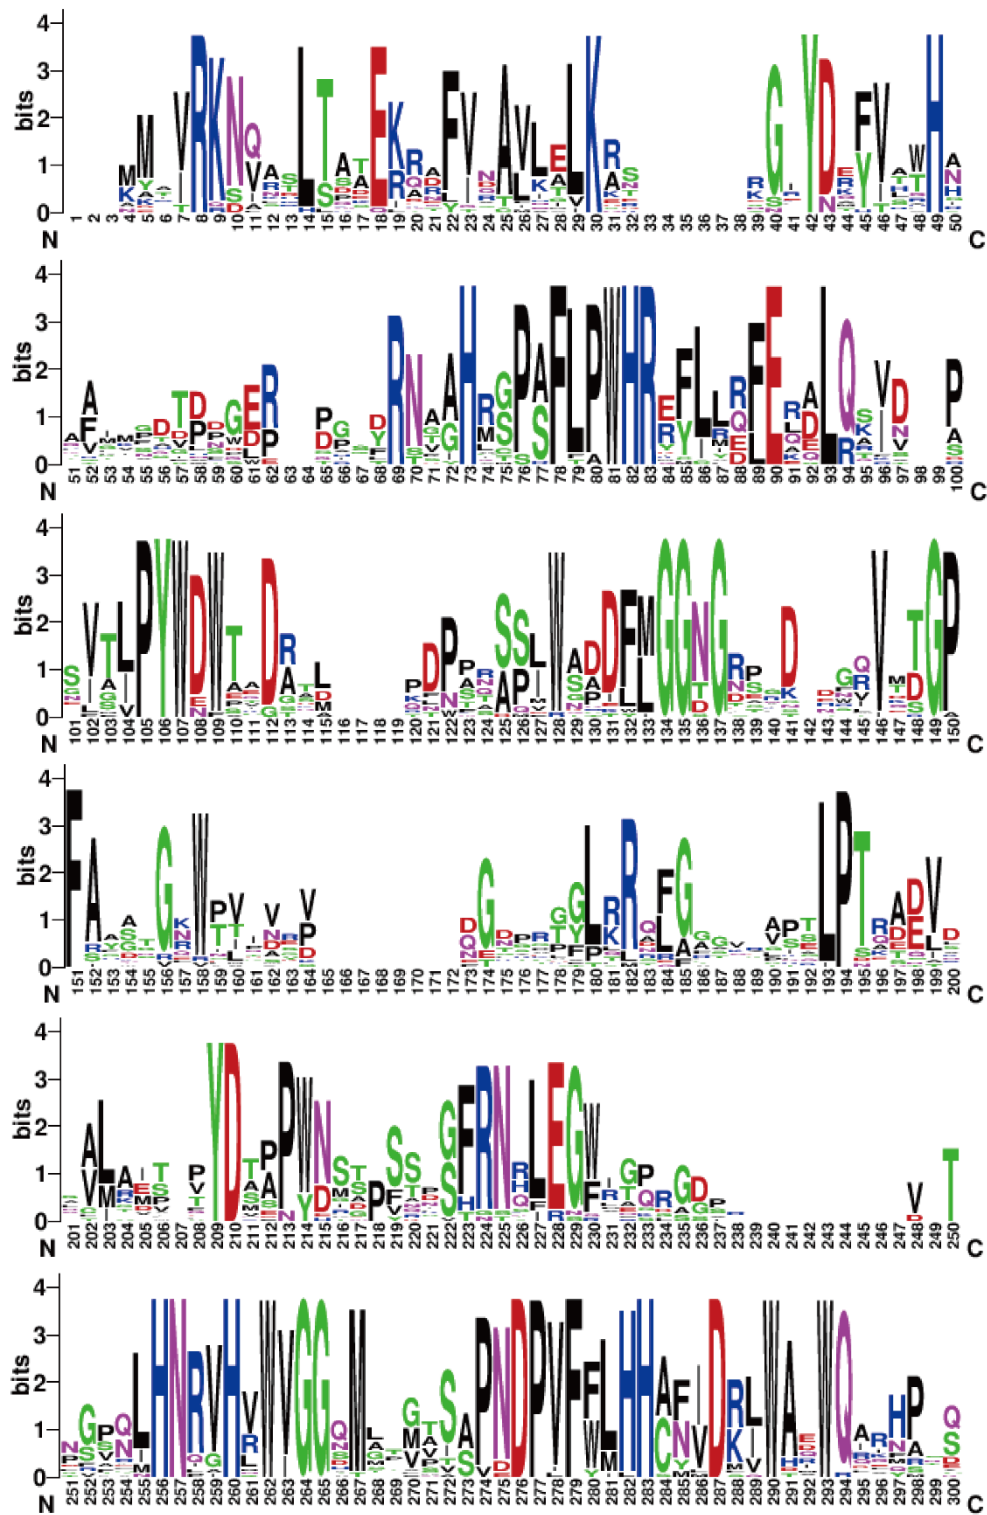

**Figure S6.** Multiple sequence alignment of *BmTyr* with homologous tyrosinase sequences from superfamily.

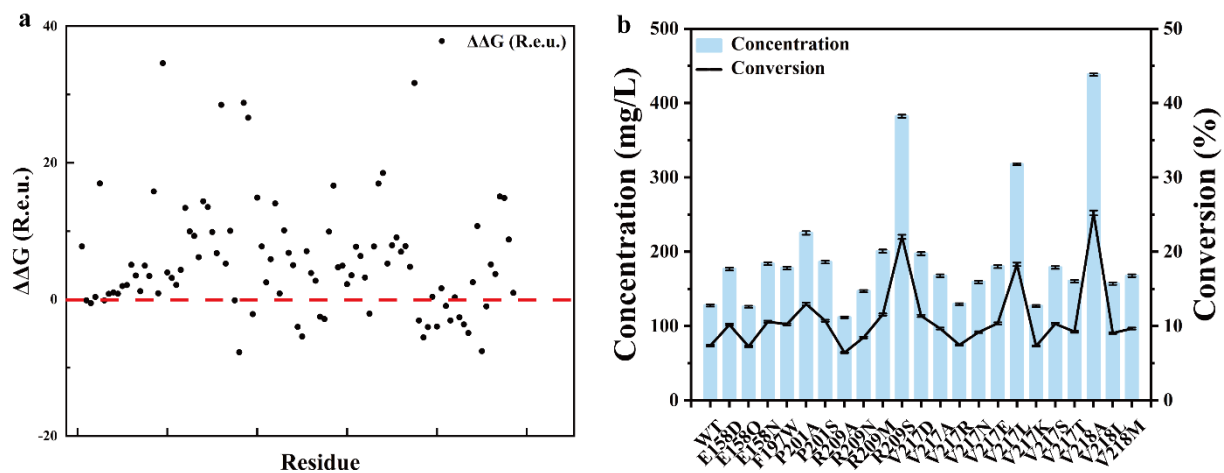

**Figure S7.** Redesign of *BmTyr*. (A) The energy difference between the wild type and the single point mutant was calculated ( $\Delta\Delta G$ ). (B) The activity of the designed enzymes on the TFDG production (5 mM substrates in Mcilvaine Buffer (0.2 M, pH 5.0), 30 °C, 0.1 mM Cu<sup>2+</sup>). The data represent mean  $\pm$  s.d., as determined from three independent experiments.

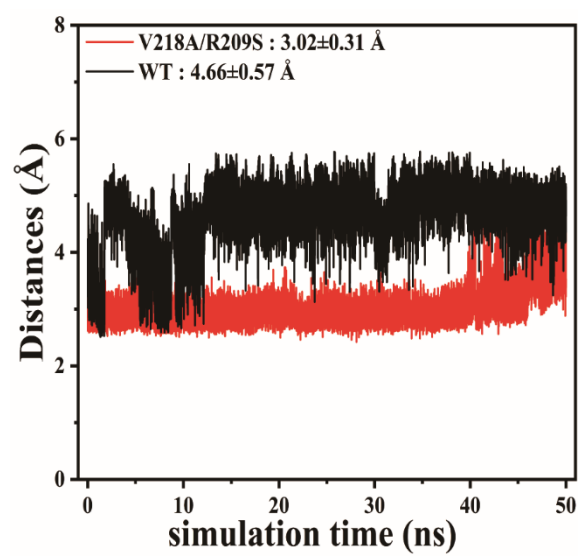

**Figure S8.** The distance between the -O11H of the hydroxy oxygen atom of EGCG and the O1 of the bridging oxygen atom of active centre.

## Supplementary Material and Methods

### Genetic constructions

The expression plasmid pET28a were purchased from Novagen (Madison, WI, U.S.A.). The host strain *E. coli* BL21(DE3) was purchased from Invitrogen (Carlsbad, CA, U.S.A.). All genetic constructions were carried out by using standard molecular biology techniques. All chemicals and reagents were pure and obtained commercially. Molecular biology reagents such as the restriction enzymes, PrimeSTAR, DNA polymerase and polymerase chain reactions (PCR) reagents were supplied by TaKaRa (Dalian, China). The cloning inserts were created via PCR of ORFs of interest from their respective genomic or synthesis by GENEWIZ (Suzhou, China). DNA and protein sequence.

The *Ec1* was synthesized and codon optimized for *E. coli*. The optimized DNA sequence is as follow:

```
ATGAGTAAGCTGATTGTCCCGCAGTGGCCGCAGCCAAAAGGTGTTGCGGCCTGTAGCTC
CACTCGTATCGGCGGCGTGAGCTTGCCCCGTATGACTCACTCAACCTCGGTGCCCATTG
TGCGGATAACCCGGATCACGTTGAGGAGAATCGCAAGCGACTTTTTGCTGCGGGCAATTT
GCCTTCTAAACCGGTCTGGCTTGAGCAGGTACACGGCAAAGATGTGCTTAAGCTCACTGG
CGAACCTTATGCCTCAAAACGGGCGGATGCCTCTTATAGCAATACGCCCGGCACGGTTTG
CGCAGTGATGACTGCCGACTGCCTCCCTGTGCTGTTTTGCAATCGAGCGGGAACGGAAG
TCGCCGCCGCTCATGCTGGCTGGCGTGGACTGTGCGCAGGCGTGCTGGAAGAGACGGTT
TCCTGTTTTGCTGATAATCCGGAAAATATTCTCGCCTGGTTAGGGCCGGCAATTGGTCCAC
GCGCGTTCGAAGTGGGGGGGGAGGTTTCGCGAGGCGTTTATGGCAGTAGACGCTAAAGCA
AGTGCAGCTTTCATTCAGCATGGTGATAAGTATCTGGCGGATATTTATCAGCTTGCCCGGC
AGCGTCTGGCGAACGTGGGTGTTGAGCAAATTTTCGGCGGCGACCGTTGTACATATACGG
AAAATGAGACTTTCTTCTCTTATCGTCGCGACAAGACCACCGGTCGTATGGCAAGTTTCA
```

TTTGGCTGATATAA

Protein sequence:

MSKLIVPQWPQPKGVAACSSSTRIGGVSLPPYDSLNLGAHCGDNPDHVEENRKRLFAAGNLPS  
KPVWLEQVHGKDVLKLTGEPYASKRADASYSNTPGTVCAVMTADCLPVLFCNRAGTEVAA  
AHAGWRGLCAGVLEETVSCFADNPENILAWLGPAIGPRAFEVGGGEVREAFMAVDAKASAAF  
IQHGDKYLADIYQLARQRLANVGVEQIFGGDRCTYTENETFFSYRRDKTTGRMASFIWLI

The *Ec2* was synthesized and codon optimized for *E. coli*. The optimized DNA sequence is as follow:

ATGAGTAAGCTGATTGTCCCGCAGTGGCCGCTGCCAAAGGGTGTTGCGGCTTG TAGCTCT  
ACTCGTATCGGCGGCGTGAGCTTGCCCCGTATGACTCGCTCAACCTCGGTGCCCATTTG  
GGCGATAACCCGGATCACGTTGAGGAGAATCGCAAGCGACTTTTTGCTGCGGGCAATTTG  
CCTTCTAAACCGGTCTGGCTTGAGCAGGTACACGGCAAAGATGTGCTTAAGCTTACTGGC  
GAACCTTATGCCTCAAAACGAGCAGATGCCTCTTATAGCAATACGCCTGGCACGGTTTGC  
GCAGTGATGACTGCCGACTGCCTCCCTGTGCTGTTTTGCAATCGAGCGGGAACGGAAGT  
CGCCGCCGCTCATGCTGGCTGGCGTGGACTGTGCGCAGGCGTGCTGGAAGAGACAGTTT  
CCTGTTTTGCTGATAATCCGGA AAAATATTCTCGCCTGGTTAGGGCCGGCAATTGGTCCACG  
CGCGTTCGAAGTGGGGGCGGAGGTTCGCGAGGCGTTTATGGCAGCAGACGCCAAAGCG  
AGTACAGCTTTCATTCAGCATGGTGATAAGTATCTGGCGGATATTTATCTGCTTGCCCGGC  
AGCGTCTGGCGAGCGTTGGTGTTGAACAAATTTTCGGCGGCGACCGTTGTACATATACGG  
AAAATGAGACTTTCTTCTCTTATCGTCGCGACAAGACCACGGGCGTGATGGCAAGTTTCA  
TTTGGCTGATATAA

Protein sequence:

MSKLIVPQWPLPKGVAACSSSTRIGGVSLPPYDSLNLGAHCGDNPDHVEENRKRLFAAGNLPS

KPVWLEQVHGKDVCLKLTGEPYASKRADASYSNTPGTVCAVMTADCLPVLFCNRAGTEVAA  
AHAGWRGLCAGVLEETVSCFADNPENILAWLGPAIGPRAFEVGAEVREAFMAADAKASTAF  
IQHGDKYLADIYLLARQLASVGVEQIFGGDRCTYTENETFFSYRRDKTTGRMASFIWLI

The *Bm* was synthesized and codon optimized for *E. coli*. The optimized DNA sequence is as follow:

ATGAGCAACAAATATCGCGTGCGCAAAAACGTGCTGCATCTGACCGATACCGAAAAACG  
CGATTTTGTGCGCACCGTGCTGATTCTGAAAGAAAAAGGCATTTATGATCGCTATATTGCG  
TGGCATGGCGCGGGCGGGCAAATTCATACCCCGCCGGGCAGCGATCGCAACGCGGGCGCA  
TATGAGCAGCGCGTTTCTGCCGTGGCATCGCGAATATCTGCTGCGCTTTGAACGCGATCTG  
CAGAGCATTAAACCCGGAAGTGACCCTGCCGTATTGGGAATGGGAAACCGATGCGCAGAT  
GCAAGATCCGAGTCAGAGTCAGATTTGGAGCGCGGATTTTATGGGCGGCAACGGCAACC  
CGATTAAAGATTTTATTGTGGATACCGGCCCCGTTTGCGGCGGGCCGCTGGACCACCATTG  
ATGAACAAGGCAACCCGAGCGGCGGCCTGAAACGCAACTTTGGCGCGACCAAAGAAGC  
GCCGACCCTGCCGACCCGCGATGATGTGCTGAACGCGCTGAAAATTACGCAGTATGATAC  
CCCGCCGTGGGATATGACGAGTCAGAACAGCTTTCGCAATCAGCTGGAAGGCTTTATTAA  
CGGCCCCGCAGCTGCATAACCGCGTGCATCGCTGGGTGGGCGGTCAGATGGGCGTGGTGC  
CGACCGCGCCGAACGATCCGGTGTTTTTCTGCATCATGCGAACGTGGATCGCATTGTTGGG  
CGGTGTGGCAGATTATTCATCGCAATCAGAACTATCAGCCGATGAAAAACGGCCCCGTTTG  
GTCAGAACTTTCGCGATCCGATGTATCCGTGGAACACCACCCCGGAAGATGTGATGAACC  
ATCGCAAACCTGGGCTATGTGTATGATATTGAACTGCGCAAAAGCAAACGCAGCAGCTAA

Protein sequence:

MSNKYKVRKNVLHLTDTEKRDFIRAVLILKEKGIYDRYIAWHGAAGKFHTPPGSDRNAAHM  
SSAFLPWHREYLLRFERDLQSINPEVTLPYWETDAQMQDPSQSQIWSADFMGGNGNPK



KDFIVDTGPFAAGRWTIDEQGNPSGGLKRNFGATKEAPTLPTRDDVLNALKITQYDTPPWD  
MTSQNSFRNQLEGFINGPQLHNRVHRWVGGQMGVVPTAPNDPVFFLHHANVDRIWAVWQI  
VHRNQNYQPMKNGPFGQNFRDSMYPWDTPKDVMDHRKLGYYVDIELRKSKRSS

The *An1* was synthesized and codon optimized for *E. coli*. The optimized DNA sequence is as follow:

ATGACAATCTTTTTGCTACTCCTTGGGCTTCTAGCCCCACTGGTCCTCTGCAGTCCAATCA  
GACACGTTACTCCGCATCTTTCCCACTCTACCCCAATACCGAGAGATATGCAAGGCAATTC  
TTCGCAGTCACCCAATACCCCATGGCAGGGATACGATATAAACACGAAC TACTATGAAAC  
CATCCACAGACCAATGTTGTCCGCGAATACTGGTTTGATATCGTCAACACGACCGCTGC  
TCTTGATGGAGTTGAGAGACCAGTGCTTCTGGTCAACGGCCAGTTTCCAGGACCTACTAT  
TGAGGCAAAC TGGGGTGACACCGTTAAAGTTCATGTTACGAATCGCATGGAAAACAATG  
GCACGGCCATCCACTTCCACGGAATTCGACAGCTCTACAACAACCAAATGGATGGCGTAG  
CAGCGTTGACTCAGTGCCCTGTTCTCCGAATTCCAGTTATACCTATGTCTGGCGAGCGGA  
AGAATATGGGTCGAGTTGGTATCACTCACACTTCTCTCTCCAGGCATGGGAAGGGGTTTT  
CGGAGGCATTTTGATTCACGGCCCTTCAACAGCGGAATATGACCACGACTTGGGAATGGT  
CTTTCTCAATGACTGGTCGCATCAAACAGTCGACGAGATGTATCAATCTGTACTCGAGAG  
TCAA AATCCGCCGCATTTTCAGACAGGCCTTATCAACGGAAGCAATATCTGGGTCACTGC  
AGATAACCAAACCGTTGGTCGCAGATTCCAAACAGAGTTTGTACCAGGCCAGAGATACC  
GGCTTCGGTTGGTCAATGCCGCCATGCATACCCATTTTAGGTTCTCAATCGATAATCATGA  
CCTTACCGTTATTGCCAGTGATTTTGTTCTATTGTACCATTACGACGAACAACGTTCCC  
ATCGGCATGGGACAACGGTATGATATTATCGTGACAGCAAACCAAGCTCCGGATAACTATT  
GGATTCGTGCAATCCCACAGTCATTCTGCAGTGACAACGCGAATTCAGACAATATTAAAG  
GAGTCCTCCATTACGAAGGTGCTGCCGATAACAGCGATCCCACGAGCACAAAGTGGGAT

TATGGTGACGACATTCAGTGCCTGGATTTCTCATTAGATGAGCTTGTCCCCTGGCTTGCCC  
TTGATGCAGATATTGGCGGTGCCCAGATGGCCGAGTCAGACGTGGACTTCACTCCGTTCG  
GGGATGTTCTTTGTATTTGTGGACAATGGGAGGCAATGCCCTTAACATCTCGTGGAAG  
ATCCACGTTACAGCAAACGTTCTGAAGATCCCGACAAAATGGACTGGAAAGCAAGCCAG  
GGCGTGATAGAGGCTGCGATCCCGAATAAATGGACCGTGTTGGTTGTCCAGACAGATCTT  
CCTGTTCTCACCTATTCATTTGCATGGGCATGATTTCTATCTCCTTGCTCAGGGATTCTGG  
CCAATTCAATCCACAGAACGTCACGCTCAAAACGCATAACCCTCCCCGCCGCGACACTGC  
GCTCATGACCGCTGCCACTCCTGAAAATGGTGGCGGGCGGCTATATGGTTATTGGCTTCCCC  
GCCGACAACCCGGGTGTATGGCTGATCCACTGCCACATTGGATTCCATGCAACAGAAGGA  
TTCGCGCAGCAGATTGTCGAGCGACAGAGTGAGTTCAACACGTTCTTCAGCGAAGACCT  
GCTGGAGAACACTTGTGATGCGTGGGATGAGTATGCCAAGGTGAATCCCTACGGACATCA  
GTACCGGGCTCTCGCTGGGCCATACGAGTCGGGTATATAA

Protein sequence:

MTIFLLLGLLAPLVLCSPIRHVTPHLSHSTPIPRDMQGNSSQSPNTPWQGYDINTNYETIPQ  
TNVVREYWFDIVNTTAALDGVERPVLLVNGQFPGPTIEANWGDTVKVHVITNRMENNGTAI  
HFHGIRQLYNNQMDGVAALTQCPVPPNSSYTYVWRAEEYGSSWYHSHFSLQAWEGVFGGIL  
IHGPSTAEYDHDLMVFLNDWSHQTVDEMYQSVLESQNPPHFQTGLINGSNIWVTADNQTV  
GRRFQTEFVPGQRYRLRLVNAAMHTHFRFSIDNHDLTVIASDFVPIVPFTTNNVPIGMGQRYD  
IIVTANQAPDNYWIRAIPQSFCSDNANSJNIKGVLYHYEGAADNSDPTSTKWDYGDDIQCLDF  
SLDELVPWLALDADIGGAQMAESDVDFTPFGDVPLYLWTMGGNALNISWKDPTLQQTFEDP  
DKMDWKASQGVIEAAIPNKWTVLVVQTDLPVPHPIHLHGHDYLLAQGFQGNPQNVTLK  
THNPPRRDTALMTAATPENGGGGYMVGFPADNPGVWLIHCHIGFHATEGFAQQIVERQSEF

NTFFSEDLLENTCDAWDEYAKVNPYGHQYRALAGPYESGI

The *An2* was synthesized and codon optimized for *E. coli*. The optimized DNA sequence is as follow:

ATGCACTTGCATACTATCCTGGCTGCGGGCTGGCTCGCAGCCAGCGCCTATGCCGGGGTT  
TCCTCTCGTTCCACGCAAGCATGCGCAGGAAACACACCGCACACCCGTGGCCAGTGGTG  
TGATTTCGACATTCACACCGACTACTATGACGAAGCTCCGGACACTGGGGTAGTTCGCGA  
ATATTGGTTGGAAGTAGGAAACACCACCGCCGCTCCCGACGGCGTCCCTCGTAATGTCCT  
AACCGTCAACGGGACGACTCCAGGGCCTACTCTATACGCCGATTGGGGTGACTGGGTCC  
GAGTTCATGTATACAATGGTCTTGAAAACAATGGAACCAGCATCCATTGGCACGGTGTCC  
GCCAGAACCACACCAACCCTCAAGACGGCACAACTCCATTACCCAATGTCCCACGCCC  
CCCGGAGGATCCGTCACGTACGAATGGCGCGCCACGCAGTACGGCACAACTACTACCA  
CTCCCACCTTTGCTCTGCAAGCATGGGAGGGCGTCTACGGTGGTATTGTGATCAACGGACC  
TGCCAGCTCGAATTACGACGTCGACGCTGGCGTGCTTTATCTCATGGACTGGTCGCACCG  
CACAGCCGACCAGATGTATTCCACCGCTGAAACGGACGGTGAACCAGAGATGACCACGG  
GTTTGATTAATGGAACGAACATCTGGGTTAAGGAGAACAACGAAACGGTCGGTTCGCGC  
TTCCTTATGAATGTGACTGCTGGCCAGTCTTACCGTCTTCGACTTATCAATGGTGGAATGA  
GCAACTTGTTCCGATTCATGATCGATGATCATACTTGACGGTTATTGCTGCGGACTTTGT  
CCCCATCGAGCCTTACAATACGACTTCGCTTAATATTGGTGTGGACAACGGTACGATGTG  
ATCGTCACGGCAAACCAAGCCCAGGCTGGGTCTGACTTCTGGATGCGTGCTATCCCCCAG  
GAGTCCTGTGCCGAGATTCAAAACACCGACATCAAGGGAATTTCCATTATGAGCAGCCT  
GACACTGCTGTAGCGACGCCCACAACAACAGCATACAACCTATAACCGACAGCTGCTACGA  
CGAGCCATTGAGTAGCTTGGTGCCGGTAGTTGCCATCGACGCGTCTGGCGTCGGCTACAA  
AAGTCATAACGAGGCGAACGTCATCATGAACAGTGCAGGCCTGTACAAGTGGTACATGG

GCCCGACCACGTTCAAGGCAGAATGGGACAACCCGACTTTGCTCCAGATCGCTAACGGC  
AACACTTCATGGACTACACATCGCACGTTGTTGAAGTTGAAGGAAACGGCAAGTGGGTG  
ATTGTTGACATTGAAATGGAAATCAATGTTCTCATCCTATTCATCTCCACGGCCACGACT  
TCTTCATCCTCGCCCAAGGCAAGGGAAGCTACACGTCGAACACGTCTCTGAACACTTAC  
AACCACCCCCGTCGGGACACGGCCATGCTCCCTGCCCTCGGATATCTGGTCATCGCATTTA  
AGACCGACAACCCTGGCGCGTGGCTTCTGCATTGCCATATTGGATGGCACCAATCGGAGG  
GCTTCGCCATGCAGTTCGTGGAGAGCATCTCTCAGCTAGAGCCTATGATTGATGCTTCCGC  
ACTCGAAAAGAACTGTGCTGCCTGGGATAAATATGCTGCTGCTAACCGCATTGAGGAGGA  
TGATTCTGGTATCTAA

Protein sequence:

MHLHTILAAGWLAASAYAGVSSRSTQACAGNTPHTRGQWCDFDIHTDYYDEAPDTGVVRE  
YWLELGNTTAAPDGVPRNVLTVNGTTPGPTLYADWGDWVRVHVYNGLENNGTSHWHGV  
RQNHTNPQDGTNSITQCPTPPGGSVTYEWRAATQYGTITYYHSHFALQAWEGVYGGIVINGPA  
SSNYDVDAGVLYLMDWSHRTADQMYSTAETDGEPEMTTGLINGTNIWVKENNETVGSRFL  
MNVTAGQSYRLRLINGGMSNLFRFMIDDHTLTVIAADFVPIEPYNTTSLNIGVGQRYDVIVTA  
NQAQAGSDFWMRAIPQESCAEIQNTDIKGIFHYEQPDTAVATPTTTAYNYTDSCYDEPLSSLV  
PVVAIDASGVGYKSHNEANVIMNSAGLYKWYMGPTTFKAEDNPTLLQIANGNTSWTNTS  
HVVEVEGNGKWVIVDIEMEINVPHPIHLHGHDFFILAQGKGSYTSNTSLNTYNPPRRDTAML  
PALGYLVIAFKTDNPGAWLLHCHIGWHQSEGFAMQFVESISQLEPMIDASALEKNCAAWDK  
YAAANRIEEDDSGI

The *Bs1* was synthesized and codon optimized for *E. coli*. The optimized DNA sequence is as follow:

ATGACACTTGAAAAATTTGTGGATGCTCTCCCAATCCCAGATACACTAAAGCCAGTACAG

CAATCAAAAGAAAAACATACTACGAAGTCACCATGGAGGAATGCACTCATCAGCTCCAT  
CGCGATCTCCCTCCAACCCGCCTGTGGGGCTACAACGGCTTATTTCCGGGACTGACCATT  
GAGGTAAAAGAAATGAAAACGTATATGTAAAATGGATGAATAACCTTCCTTCCACGCATT  
TCCTTCCGATTGATCACACCATTTCATCACAGTGACAGCCAGCATGAAGAGCCCGAGGTAA  
AGACTGTTGTTCAATTACACGGCGGGCTCACGCCAGATGATAGTGACGGGTATCCGGAGG  
CTTGGTTTTCCAAAGACTTTGAACAAACAGGACCTTATTTCAAAGAGAGGTTTTTCATT  
ATCCAAACCAGCAGCGCGGGGCTATATTGTGGTATCACGATCGCGCCATGGCGCTCACCA  
GGCTAAATGTCTATGCCGGACTTGTGCGGTGCATATATCATTCATGACCCAAAGGAAAAACG  
CTTAAACTGCCTTCAGACGAATACGATGTGCCGCTTCTTATCACAGACCGCACGACCAA  
TGAGGATGGTTCTTTGTTTTATCCGAGCGCACCGGAAAACCCTTCTCCGTCCTGCCTAAT  
CCTTCAATCGTTCCGGCTTTTTGCGGAGAAACCATACTCGTCAACGGGAAGGTATGGCCA  
TACTTGGAAGTCGAGCCAAGGAAATACCGATTCCGTGTCATCAACGCCTCCAATACAAGA  
ACCTATAACCTGTCACTCGATAATGGCGGAGATTTTATTCAGATTGGTTCAGATGGAGGGC  
TCCTGCCGCGATCTGTAAACTGAATTCTTTCAGCCTTGCGCCTGCTGAACGTTACGATAT  
CATCATTGACTTCACAGCATATGAAGGAGAATCGATCATTTTGGCAAACAGCGCGGGCTG  
CGGCGGTGACGTCAATCCTGAAACAGATGCGAATATCATGCAATTCAGAGTCACAAAACC  
ATTGGCACAAAAGACGAAAGCAGAAAGCCGAAGTACCTCGCCTCATACCCTTCGGTAC  
AGCATGAAAGAATACAAAACATCAGAACGTTAAAACTGGCAGGCACCCAGGACGAATAC  
GGCAGACCCGTCCTTCTGCTTAATAACAAACGCTGGCACGATCCCGTCACAGAAACACC  
AAAAGTCGGCACAACTGAAATATGGTCCATTATCAACCCGACACGCGGAACACATCCGAT  
CCACCTGCATCTAGTCTCCTTCCGTGTATTAGACCGGCGGCCGTTTGATATCGCCCGTTATC  
AAGAAAGCGGGGAATTGTCCTATACCGGTCCGGCCGTCCCGCCGCCGCAAGTGAAAAG

GGCTGGAAAGACACCATTC AAGCGCATGCAGGTGAAGTCCTGAGAATCGCGGCGACATT  
CGGTCCGTACAGCGGACGATACGTATGGCATTGCCATATTCTAGAGCATGAAGACTATGAC  
ATGATGAGACCGATGGATATAACTGATCCCCATAAATAA

Protein sequence:

MTLEKFVDALPIPD TLKPVQQSKEKTY YEVTMEECTHQLHRDLPPTRLWGYNGLFPGLTIEV  
KRNENVYVKWMNNLPSTHFLPIDHTIHHSDSQHEEPEVKTVVHLHGGVTPDDSDGYPEAWF  
SKDFEQTGPFYFKREVFHYPNQQRGAILWYHDRAMALTRLNVYAGLVGAYIIHDPKEKRLKL  
PSDEYDVPLLITDR TTNEDGSLFYPSAPENPSPSLPNPSIVPAFCGETILVNGKVWPYLEVEPR  
KYRFRVINASNTRTYNLSLDNNGGDFIQIGSDGGLPRSVKLNSFSLAPAERYDIIIDFTAYEGES  
IILANSAGCGGDVNPETDANIMQFRVTKPLAQKDESRKPKYLASYPSVQHERIQNIRTLKLAG  
TQDEYGRPVL LLNNKRWHDPVTETPKVGTTEIWSIINPTRGTHPIHLHLVSFRVLDRRPF DIA  
RYQESGELSYTGPAVPPPPSEKGWKDTIQAHAGEVLRIAATFGPYSGRYVWHCHILEHEDYD  
MMRPM DITDPHK

The *Bs2* was synthesized and codon optimized for *E. coli*. The optimized DNA sequence is as follow:

ATGAATACATATCACC CATTCAGTCTTACCACACCCTCGACACTCATGATACAAGACTGGG  
CTCAAACGAATCAAAACAACAAAGAGGTCATTGCCGGATTTACGACAAAAAACGGCGGT  
GTCAGCCAAAAGCCTTTTGAATCGTTAAATACAGGATTGCACGTT CATGACAAAGATGCA  
GATGTAGTTAAAAATCGTGAATATATTGCCGATATGTTTAATACTGATTTGCAGTCTTGGGT  
ATTCGCTGATCAGACACATGATAATCGCGTTCAGAAAGTGACGCAGAGGGATAGGGGAA  
AAGGCGCCCGTGAGTATCACACGGCTCTAAAAGCAACGGACGGGCTCTATACAAATGAA  
AAAAATGTATTTTTTAGCATTATGCTTTGCTGATTGTGTGCCTCTTTTCTTTTATGATCCGGTT  
AAGTCGCTTGTCGGAGTCGCCCATGCCGGGTGGAAAGGCACCGTCAAACAGATTGGCAG

AGAAATGGTGAAGCAATGGACTGAGAAGGAAGGTTCAAATCTCTCAGATATTTACGCTGT  
TATTGGCCCGTCTATCAGCGGAGCATGCTATACGGTAGACGACCGCGTCATGGATGCTGTT  
CGTGCATTGCCGGTTTCAGCAGACCTTGCCGCCAATCAGACGGCAAAGGCACAATATCAG  
CTTGATCTGAAAGAGCTGAACCGTCTTATACTGATGGACAGCGGTTTGGCAAGTGAACAA  
ATTTCTGTCAGCGGTTTATGCACGGAAAGCGAGCCGTCTCTTTTCTATTCTCATCGCCGCG  
ATCAGGGGAAAACCTGGACGGATGATGTCCTTTATCGGAATGAAGGAGGCATAA

Protein sequence:

MNTYHPFSLTTPSTLMIQDWAQTNQNNKEVIAGFTTKNGGVSQKPFESLNTGLHVHDKDAD  
VVKNREYIADMFNLDLQSWVFADQTHDNRVQKVTQRDRGKGAREYHTALKATDGLYTNE  
KNVFLALCFADCVPPLFFYDPVKSLVGVAHAGWKGTVKQIGREMVKQWTEKEGSNLSDIYAV  
IGPSISGACYTVDDRVM DAVRALPVSADLAANQTAKAQYQLDLKELNRLILMDSGLASEQIS  
VSGLCTESEPSLFYSHRRDQGKTGRMMSFIGMKEA
